# Supplementary material for: Immune profiling of age and adjuvant-specific activation of human blood mononuclear cells in vitro
Source: Research Square preprint supplement (doi:10.21203/rs.3.rs-3377826/v1), 2023-09-27
Supplement: Supplementary file 1 [file 5a067b2f8f0ffda0da00f52e.xlsx]

## Sheet: Participants Details
	Participant group	Sample No.	Sample Identifier	Sex	Age (gestational wk)	Date of collection	Core Exp #
	Newborn	1	N01	Male	38.4	2018	1
		2	N02	Male	38.6	2018	3
		3	N03	Female	39.4	2018	3
		4	N04	Female	39.5	2018	4
		5	N05	Female	39.2	2018	5
		6	N06	Female	39.1	2018	5
		7	N07	Male	39	2018	7
		8	N08	Female	38.2	2018	8
		9	N09	Male	39.2	2018	9
		10	N10	Male	39.3	2018	10
			Identifier	Sex	Age (Yr of life)	Date of collection	Core Exp #
	Adult	1	A01	Female	63	2018	1
		2	A02	Male	36	2018	2
		3	A03	Female	22	2018	4
		4	A04	Male	32	2018	4
		5	A05	Male	28	2018	5
		6	A06	Male	44	2018	6
		7	A07	Male	46	2018	6
		8	A08	Female	22	2018	7
		9	A09	Female	29	2018	8
		10	A10	Female	25	2018	9
		11	A11	Male	31	2018	10
			Identifier	Sex	Age (Yr of life)	Date of collection	Core Exp #
	Elder	1	E01	Male	67	2018	1
		2	E02	Female	65	2018	2
		3	E03	Male	85	2018	2
		4	E04	Male	67	2018	3
		5	E05	Male	66	2018	6
		6	E06	Female	69	2018	7
		7	E07	Female	65	2018	8
		8	E08	Female	70	2018	9
		9	E09	Male	71	2018	10

## Sheet: Sample Details_Control
	Sample Identifier	FCS File name_Control
	N01	PBMCs18h_Exp1_N01_ctrl_QC.fcs
	N02	PBMCs18h_Exp3_N02_ctrl_QC.fcs
	N03	PBMCs18h_Exp3_N03_ctrl_QC.fcs
	N04	PBMCs18h_Exp4_N04_ctrl_QC.fcs
	N05	PBMCs18h_Exp5_N05_ctrl_QC.fcs
	N06	PBMCs18h_Exp5_N06_ctrl_QC.fcs
	N07	PBMCs18h_Exp7_N07_ctrl_QC.fcs
	N08	PBMCs18h_Exp8_N08_ctrl_QC.fcs
	N09	PBMCs18h_Exp9_N09_ctrl_QC.fcs
	N10	c01_Core_Experiment_10_01_1_0_N10_ctrl_QC.fcs
	Identifier	FCS File name_Control
	A01	PBMCs18h_Exp1_A01_ctrl_QC.fcs
	A02	PBMCs18h_Exp2_A02_ctrl_QC.fcs
	A03	PBMCs18h_Exp4_A03_ctrl_QC.fcs
	A04	PBMCs18h_Exp4_A04_ctrl_QC.fcs
	A05	PBMCs18h_Exp5_A05_ctrl_QC.fcs
	A06	PBMCs18h_Exp6_A06_ctrl_QC.fcs
	A07	PBMCs18h_Exp6_A07_ctrl_QC.fcs
	A08	PBMCs18h_Exp7_A08_ctrl_QC.fcs
	A09	PBMCs18h_Exp8_A09_ctrl_QC.fcs
	A10	PBMCs18h_Exp9_A10_ctrl_QC.fcs
	A11	c07_Core_Experiment_10_01_1_0_A11_ctrl_QC.fcs
	Identifier	FCS File name_Control
	E01	PBMCs18h_Exp1_E01_ctrl_QC.fcs
	E02	PBMCs18h_Exp2_E02_ctrl_QC.fcs
	E03	PBMCs18h_Exp2_E03_ctrl_QC.fcs
	E04	PBMCs18h_Exp3_E04_ctrl_QC.fcs
	E05	PBMCs18h_Exp6_E05_ctrl_QC.fcs
	E06	PBMCs18h_Exp7_E06_ctrl_QC.fcs
	E07	PBMCs18h_Exp8_E07_ctrl_QC.fcs
	E08	PBMCs18h_Exp9_E08_ctrl_QC.fcs
	E09	c13_Core_Experiment_10_01_1_0_E09_ctrl_QC.fcs
		* PBMCs18h_Exp6_A06_R848_QC.fcs	* We kept this file in the control group for maintaining the gating strategy only.
	The FCS files are automatically excluded from the tSNE-CUDA analysis which does not possess 70K events of MNC population.
Metal	Marker	Reason of exclusion
103Rh	Viability	No signal
143Nd	CD274	Technical error
144Nd	FoxP3	Technical error
153Eu	CD1c	Technical error
154Sm	Slan	Technical error
5 markers were excluded during quality assessment due to no signal or technical errors from downstream analysis.

## Sheet: Sample Details_Alum
	Sample Identifier	FCS File name_Alum
	N01	PBMCs18h_Exp1_N01_Alum_QC.fcs
	N02	PBMCs18h_Exp3_N02_Alum_QC.fcs
	N03	PBMCs18h_Exp3_N03_Alum_QC.fcs
	N04	PBMCs18h_Exp4_N04_Alum_QC.fcs
	N05	PBMCs18h_Exp5_N05_Alum_QC.fcs
	N06	PBMCs18h_Exp5_N06_Alum_QC.fcs
	N07	PBMCs18h_Exp7_N07_Alum_QC.fcs
	N08	PBMCs18h_Exp8_N08_Alum_QC.fcs
	N09	PBMCs18h_Exp9_N09_Alum_QC.fcs
	N10	c02_Core_Experiment_10_01_1_0_N10_Alum_QC.fcs
	Identifier	FCS File name_Alum
	A01	PBMCs18h_Exp1_A01_Alum_QC.fcs
	A02	PBMCs18h_Exp2_A02_Alum_QC.fcs
	A03	PBMCs18h_Exp4_A03_Alum_QC.fcs
	A04	PBMCs18h_Exp4_A04_Alum_QC.fcs
	A05	PBMCs18h_Exp5_A05_Alum_QC.fcs
	A06	PBMCs18h_Exp6_A06_Alum_QC.fcs
	A07	PBMCs18h_Exp6_A07_Alum_QC.fcs
	A08	PBMCs18h_Exp7_A08_Alum_QC.fcs
	A09	PBMCs18h_Exp8_A09_Alum_QC.fcs
	A10	PBMCs18h_Exp9_A10_Alum_QC.fcs
	A11	c08_Core_Experiment_10_01_1_0_A11_Alum_QC.fcs
	Identifier	FCS File name_Alum
	E01	PBMCs18h_Exp1_E01_Alum_QC.fcs
	E02	PBMCs18h_Exp2_E02_Alum_QC.fcs
	E03	PBMCs18h_Exp2_E03_Alum_QC.fcs
	E04	PBMCs18h_Exp3_E04_Alum_QC.fcs
	E05	PBMCs18h_Exp6_E05_Alum_QC.fcs
	E06	PBMCs18h_Exp7_E06_Alum_QC.fcs
	E07	PBMCs18h_Exp8_E07_Alum_QC.fcs
	E08	PBMCs18h_Exp9_E08_Alum_QC.fcs
	E09	c14_Core_Experiment_10_01_1_0_E09_Alum_QC.fcs
		*c01_Core_Experiment_10_01_1_0_N10_ctrl_QC.fcs	* We kept this file in the Alum group for maintaining the gating strategy only.
	The FCS files are automatically excluded from the tSNE-CUDA analysis which does not possess 70K events of MNC population.
Metal	Marker	Reason of exclusion
103Rh	Viability	No signal
143Nd	CD274	Technical error
144Nd	FoxP3	Technical error
153Eu	CD1c	Technical error
154Sm	Slan	Technical error
5 markers were excluded during quality assessment due to no signal or technical errors from downstream analysis.

## Sheet: Sample Details_MPLA
	Sample Identifier	FCS File name_MPLA
	N01	PBMCs18h_Exp1_N01_MPLA4_QC.fcs
	N02	PBMCs18h_Exp3_N02_MPLA_QC.fcs
	N03	PBMCs18h_Exp3_N03_MPLA_QC.fcs
	N04	PBMCs18h_Exp4_N04_MPLA_QC.fcs
	N05	PBMCs18h_Exp5_N05_MPLA_QC.fcs
	N06	PBMCs18h_Exp5_N06_MPLA_QC.fcs
	N07	PBMCs18h_Exp7_N07_MPLA_QC.fcs
	N08	PBMCs18h_Exp8_N08_MPLA_QC.fcs
	N09	PBMCs18h_Exp9_N09_MPLA_QC.fcs
	N10	c03_Core_Experiment_10_01_1_0_N10_MPLA_QC.fcs
	Identifier	FCS File name_MPLA
	A01	PBMCs18h_Exp1_A01_MPLA4_QC.fcs
	A02	PBMCs18h_Exp2_A02_MPLA4_QC.fcs
	A03	PBMCs18h_Exp4_A03_MPLA_QC.fcs
	A04	PBMCs18h_Exp4_A04_MPLA_QC.fcs
	A05	PBMCs18h_Exp5_A05_MPLA_QC.fcs
	A06	PBMCs18h_Exp6_A06_MPLA_QC.fcs
	A07	PBMCs18h_Exp6_A07_MPLA_QC.fcs
	A08	PBMCs18h_Exp7_A08_MPLA_QC.fcs
	A09	PBMCs18h_Exp8_A09_MPLA_QC.fcs
	A10	PBMCs18h_Exp9_A10_MPLA_QC.fcs
	A11	c09_Core_Experiment_10_01_1_0_A11_MPLA_QC.fcs
	Identifier	FCS File name_MPLA
	E01	PBMCs18h_Exp1_E01_MPLA_QC.fcs
	E02	PBMCs18h_Exp2_E02_MPLA4_QC.fcs
	E03	PBMCs18h_Exp2_E03_MPLA_QC.fcs
	E04	PBMCs18h_Exp3_E04_MPLA_QC.fcs
	E05	PBMCs18h_Exp6_E05_MPLA_QC.fcs
	E06	PBMCs18h_Exp7_E06_MPLA_QC.fcs
	E07	PBMCs18h_Exp8_E07_MPLA_QC.fcs
	E08	PBMCs18h_Exp9_E08_MPLA_QC.fcs
	E09	c15_Core_Experiment_10_01_1_0_E09_MPLA_QC.fcs
		*c01_Core_Experiment_10_01_1_0_N10_ctrl_QC.fcs	* We kept this file in the MPLA group for maintaining the gating strategy only.
	The FCS files are automatically excluded from the tSNE-CUDA analysis which does not possess 70K events of MNC population.
Metal	Marker	Reason of exclusion
103Rh	Viability	No signal
143Nd	CD274	Technical error
144Nd	FoxP3	Technical error
153Eu	CD1c	Technical error
154Sm	Slan	Technical error
5 markers were excluded during quality assessment due to no signal or technical errors from downstream analysis.

## Sheet: Sample Details_CpG
	Sample Identifier	FCS File name_CpG
	N01	PBMCs18h_Exp1_N01_CpGA_QC.fcs
	N02	PBMCs18h_Exp3_N02_CpGA_QC.fcs
	N03	PBMCs18h_Exp3_N03_CpGA_QC.fcs
	N04	PBMCs18h_Exp4_N04_CpGA_QC.fcs
	N05	PBMCs18h_Exp5_N05_CpGA_QC.fcs
	N06	PBMCs18h_Exp5_N06_CpGA_QC.fcs
	N07	PBMCs18h_Exp7_N07_CpGA_QC.fcs
	N08	PBMCs18h_Exp8_N08_CpGA_QC.fcs
	N09	PBMCs18h_Exp9_N09_CpGA_QC.fcs
	N10	c05_Core_Experiment_10_01_1_0_N10_CpGA_QC.fcs
	Identifier	FCS File name_CpG
	A01	PBMCs18h_Exp1_A01_CpGA_QC.fcs
	A02	PBMCs18h_Exp2_A02_CpGA_QC.fcs
	A03	PBMCs18h_Exp4_A03_CpGA_QC.fcs
	A04	PBMCs18h_Exp4_A04_CpGA_QC.fcs
	A05	PBMCs18h_Exp5_A05_CpGA_QC.fcs
	A06	PBMCs18h_Exp6_A06_CpGA_QC.fcs
	A07	PBMCs18h_Exp6_A07_CpGA_QC.fcs
	A08	PBMCs18h_Exp7_A08_CpGA_QC.fcs
	A09	PBMCs18h_Exp8_A09_CpGA_QC.fcs
	A10	PBMCs18h_Exp9_A10_CpGA_QC.fcs
	A11	c11_Core_Experiment_10_01_1_0_A11_CpGA_QC.fcs
	Identifier	FCS File name_CpG
	E01	PBMCs18h_Exp1_E01_CpGA_QC.fcs
	E02	PBMCs18h_Exp2_E02_CpGA_QC.fcs
	E03	PBMCs18h_Exp2_E03_CpGA_QC.fcs
	E04	PBMCs18h_Exp3_E04_CpGA_QC.fcs
	E05	cPBMCs18h_Exp6_E05_CpGA_QC.fcs
	E06	PBMCs18h_Exp7_E06_CpGA_QC.fcs
	E07	PBMCs18h_Exp8_E07_CpGA_QC.fcs
	E08	PBMCs18h_Exp9_E08_CpGA_QC.fcs
	E09	c17_Core_Experiment_10_01_1_0_E09_CpGA_QC.fcs
		*c01_Core_Experiment_10_01_1_0_N10_ctrl_QC.fcs	* We kept this file in the CpG treated group for maintaining the gating strategy only.
	The FCS files are automatically excluded from the tSNE-CUDA analysis which does not possess 70K events of MNC population.
Metal	Marker	Reason of exclusion
103Rh	Viability	No signal
143Nd	CD274	Technical error
144Nd	FoxP3	Technical error
153Eu	CD1c	Technical error
154Sm	Slan	Technical error
5 markers were excluded during quality assessment due to no signal or technical errors from downstream analysis.

## Sheet: Sample Details_R848
	Sample Identifier	FCS File name_R848
	N01	PBMCs18h_Exp1_N01_R848_QC.fcs
	N02	PBMCs18h_Exp3_N02_R848_QC.fcs
	N03	PBMCs18h_Exp3_N03_R848_QC.fcs
	N04	PBMCs18h_Exp4_N04_R848_QC.fcs
	N05	PBMCs18h_Exp5_N05_R848_QC.fcs
	N06	PBMCs18h_Exp5_N06_R848_QC.fcs
	N07	PBMCs18h_Exp7_N07_R848_QC.fcs
	N08	PBMCs18h_Exp8_N08_R848_QC.fcs
	N09	PBMCs18h_Exp9_N09_R848_QC.fcs
	N10	c04_Core_Experiment_10_01_1_0_N10_R848_QC.fcs
	Identifier	FCS File name_R848
	A01	PBMCs18h_Exp1_A01_R848_QC.fcs
	A02	PBMCs18h_Exp2_A02_R848_QC.fcs
	A03	PBMCs18h_Exp4_A03_R848_QC.fcs
	A04	PBMCs18h_Exp4_A04_R848_QC.fcs
	A05	PBMCs18h_Exp5_A05_R848_QC.fcs
	A06	PBMCs18h_Exp6_A06_R848_QC.fcs
	A07	PBMCs18h_Exp6_A07_R848_QC.fcs
	A08	PBMCs18h_Exp7_A08_R848_QC.fcs
	A09	PBMCs18h_Exp8_A09_R848_QC.fcs
	A10	PBMCs18h_Exp9_A10_R848_QC.fcs
	A11	c10_Core_Experiment_10_01_1_0_A11_R848_QC.fcs
	Identifier	FCS File name_R848
	E01	PBMCs18h_Exp1_E01_R848_QC.fcs
	E02	PBMCs18h_Exp2_E02_R848_QC.fcs
	E03	PBMCs18h_Exp2_E03_R848_QC.fcs
	E04	PBMCs18h_Exp3_E04_R848_QC.fcs
	E05	PBMCs18h_Exp6_E05_R848_QC.fcs
	E06	PBMCs18h_Exp7_E06_R848_QC.fcs
	E07	PBMCs18h_Exp8_E07_R848_QC.fcs
	E08	PBMCs18h_Exp9_E08_R848_QC.fcs
	E09	c16_Core_Experiment_10_01_1_0_E09_R848_QC.fcs
	The FCS files are automatically excluded from the tSNE-CUDA analysis which does not possess 70K events of MNC population.
Metal	Marker	Reason of exclusion
103Rh	Viability	No signal
143Nd	CD274	Technical error
144Nd	FoxP3	Technical error
153Eu	CD1c	Technical error
154Sm	Slan	Technical error
5 markers were excluded during quality assessment due to no signal or technical errors from downstream analysis.
