# Supplementary material for: Immune profiling of age and adjuvant-specific activation of human blood mononuclear cells in vitro
Source: Research Square preprint supplement (doi:10.21203/rs.3.rs-3377826/v1), 2023-09-27
Supplement: Supplementary file 2 [file dda69e0587231ef86e26412d.xlsx]

## Sheet: Fig. 2B
			Newborn						Adult						Elder
	Control	Alum	MPLA	CpG	R848		Control	Alum	MPLA	CpG	R848		Control	Alum	MPLA	CpG	R848
	7.38885	18.9726	62.2815	88.3624	48.7044		20.9596	22.5377	10.1212	24.5348	67.1901		17.6702	10.2112	71.9561	26.675	39.6414
	20.3431	21.81	66.0334	72.4312	36.7521		45.6932	4.39969	29.0051	52.2008	4.7984		22.0606	8.29635	38.143	60.6396	13.1708
	36.1539	9.65612	69.5667	8.70068	7.44821		19.6463	22.2744	8.0431	52.9418	11.7825		11.258	16.273	55.9637	45.5756	50.6805
	9.3955	5.60912	15.541	46.2888	9.70047		14.7537	6.235	45.3304	17.3518	8.10173		3.3357	9.27526	40.1902	81.5671	14.2941
	5.91101	11.5799	6.5935	5.46905	13.6335		5.826	8.56	46.8209	47.9106	10.246		4.71914	5.92095	14.5215	43.5511	7.37845
	9.38669	4.97444	19.5488	7.16016	5.71691		20.0416	23.0326	95.4638	56.2337	25.7812		6.75585	6.81922	8.96086	45.2653	29.6465
	2.63181	6.08667	3.75552	14.7491	5.36613		3.75182	28.1688	14.7846	77.6419	19.5652		10.5707	7.29428	14.3136	103.164	28.1442
	4.56473	18.9828	6.63256	41.7992	11.4654		3.35944	7.36363	11.0589	34.1244	4.51297			14.0203	14.7977	40.8685	7.04512
	6.56811		5.34564		4.73584		14.7741	7.21699	87.2968	26.7749	65.6403					34.0916
	15.0008		13.7859				9.97571	12.5469	17.115	98.9136	6.13687
								21.3143		41.0425

## Sheet: Fig. 2C
			Newborn						Adult						Elder
	Control	Alum	MPLA	CpG	R848		Control	Alum	MPLA	CpG	R848		Control	Alum	MPLA	CpG	R848
	19.0202	0	1.62655	159.458	25.8673		9.10404	21.618	2.88144	17.9319	25.181		0	38.4357	4.44829	9.2182	47.4379
	0	0	6.23358	157.83	36.5317		1.88624	1.73625	0.042437	50.1749	1.27747		5.96396	0	17.3219	44.1823	13.8083
	0	2.96127	9.71397	0.191973	13.9103		0	0	2.1309	0.937803	1.85355		0	1.59621	13.2363	75.6257	24.651
	0	0	15.1301	0	2.01703		0	0.595995	0	0.935863	7.18826		0	0	0.742328	64.8386	11.418
	0	0	0	23.1997	0.327453		0	0	1.14155	0.261388	13.0042		0	0	0	215.697	27.7125
	0	0	0	0	0		0	0	1.32244	0.623376	8.06968		0	0	0.535061	11.9058	2.47477
	0	0	0	11.8881	0.962963		0	0	0	120.334	1.86684		57.8316	0	0	5.13588	2.3198
	0	0.570666	0	156.73	0.26425		0	0	24.3388	0	15.0159			59.4412	31.826	6.60031	5.08364
	0		0		4.33376		0.436293	0	2.94775	61.6026	27.7431					134.698
	57.1627		52.037				37.1595	0	27.4275	2.76436	15.4483
								0.146984		95.6109

## Sheet: Fig. 2D
			Newborn						Adult						Elder
	Control	Alum	MPLA	CpG	R848		Control	Alum	MPLA	CpG	R848		Control	Alum	MPLA	CpG	R848
	2.49288	15.2474	2.81881	62.2144	24.0455		12.9889	10.4768	11.4107	6.80127	18.8236		21.6989	4.59918	6.44696	7.73248	23.6413
	17.1032	14.1229	31.9837	54.101	24.1324		7.98181	3.90782	21.4177	41.389	5.98988		47.6867	16.8037	26.2404	52.4964	22.1401
	26.5248	12.4236	34.678	19.86	7.26986		13.3863	16.2316	10.8738	58.2947	13.4421		12.1161	17.3596	56.9536	64.1364	28.0077
	11.0587	6.45904	14.7123	33.7239	11.2479		15.4956	9.27053	23.5776	16.0733	6.79891		9.34793	9.23923	20.4609	46.5131	11.8573
	10.5451	11.5851	12.3865	18.51	8.36557		8.3182	8.54759	20.9094	46.7114	7.8521		6.52512	7.66381	26.7112	44.4759	10.0711
	9.09812	4.74472	14.3134	24.827	7.88555		10.0233	13.4696	20.8371	48.6423	8.45139		9.29037	7.11501	9.43838	61.0689	7.51382
	7.42011	7.01919	7.62808	17.9475	7.52696		11.3367	16.0553	12.0726	49.6396	12.9568		14.2356	7.94285	12.2641	57.9541	6.67903
	7.23493	14.6645	10.4124	58.8594	9.38567		6.05202	7.95181	16.7057	39.1451	6.9361			13.1229	13.6522	21.6032	3.4773
	8.51741		6.77704		4.60762		14.69	6.56199	29.8455	44.7693	20.7365					45.375
	18.7869		14.2934				13.9515	12.6894	24.5871	76.6471	7.88688
								12.9234		51.1891

## Sheet: Fig. 3B
			Newborn						Adult						Elder
	Control	Alum	MPLA	CpG	R848		Control	Alum	MPLA	CpG	R848		Control	Alum	MPLA	CpG	R848
	0	0	0	0	28.6942		0	0	0.919909	0	2.90814		0	0	0	0	27.419
	0	0	0	0	18.212		4.93747	0.782339	0	0.849957	0.654333		0	0	0	0	1.57523
	0	0	0	0	0.204271		0	0	0	0.567128	0.324333		0	0	0	0.559535	17.7794
	0	0	0	0	0		0	0	0	0	2.1503		0	0	0	0	0.43292
	0	0	0	0	2.17777		0	0	0	0	1.36296		0	0	0	0	8.73208
	0	0	0	0	0		0	0	0	0	5.98126		0	0	0	0.33989	9.32911
	0	0	0	0	4.90006		0	0	0	0	5.80675		0	0	0	0	6.03034
	0	0	0	0	0		0	0	0	0	4.18267			0	0	0	5.18147
	0		0		0.275818		0	0	0.301377	0.406813	12.784					0
	0		0				0	0	0	0	1.25828
								0		0.830269

## Sheet: Fig. 3C
			Newborn						Adult						Elder
	Control	Alum	MPLA	CpG	R848		Control	Alum	MPLA	CpG	R848		Control	Alum	MPLA	CpG	R848
	0	0	0	0	6.91186		0	0	0	0	3.89204		0	0	0	0	11.8443
	0	0	0	0	8.17849		0	0.708019	0	0.622027	18.1419		0	0	0	0	5.37768
	0	0	0	0	3.50313		0	0	0	0.231639	8.72194		0	0	0	0	8.27587
	0	0	0	0	0.584167		0	0	0	0	5.50724		0	0	0	0	2.37469
	0	0	0	0	1.31828		0	0	0	0	17.9126		0	0	0	0	29.3788
	0	0	0	0	0		0	0	0	0	8.1154		0	0	0	0.73601	10.5361
	0	0	0	0	1.29168		0	0	0	0	17.3526		0	0	0	4.14706	2.33873
	0	0	0	0	0		0	0	0	0	20.8106			0	0	0	2.65683
	0		0		1.92284		0	0	0	1.76984	19.7347					0
	0		0				0	0	0.0547895	1.16381	4.98088
								0		0.160544

## Sheet: Fig. 3D
			Newborn						Adult						Elder
	Control	Alum	MPLA	CpG	R848		Control	Alum	MPLA	CpG	R848		Control	Alum	MPLA	CpG	R848
	0	0	0	0	2.62403		0	0	0.659194	0	0		0	0	0	0	6.28408
	0	0	0	0	2.76107		1.32783	0.460223	0	0	0.966472		0.233	0	0	0	0.958093
	0	0	0	0	0		0	0	0	0.875203	0.041071		0	0	0.000162	1.23234	3.03831
	0	0	0	0	0		0	0	0	0	0		0	0	0	0	0
	0	0	0	0	0		0	0	0	0	0		0	0	0	0	3.82058
	0	0	0	0	0		0	0	0	0	0		0	0	0	2.19004	1.07676
	0	0	0	0	2.21771		0	0	0	0	0.871459		0	0	0	0.705239	0
	0	0	0	0	0		0	0	0	0	0.203538			0	0	0	0.155565
	0		0		0		0.300517	0	0.704726	1.48244	3.28763					0
	0		0				0	0	0.180806	1.56225	1.35376
								0		1.18985

## Sheet: Fig. 5A
			Newborn
	Control	Alum	MPLA	CpG	R848
	1.14714	2.04714	1.06143	3.34143	7.71143
	2.07286	2.06143	2.46429	3.45571	6.10429
	2.07429	0.154286	2.22857	0.344286	1.57286
	0.23	0.228571	0.167143	0.324286	2.77143
	0.21	0.212857	0.221429	0.288571	3.71286
	0.267143	0.481429	0.23	0.468571	1.10143
	0.245714	0.934286	0.261429	1.11143	3.62571
	0.505714	0.33	0.487143	0.662857	2.26143
	1.16286		1.32571		5.28857
	0.277143		0.495714

## Sheet: Fig. 5B
			Adult
	Control	Alum	MPLA	CpG	R848
	1.20857	1.34714	3.37714	1.39143	8.02143
	4.22857	3.67143	0.428571	4.27286	6.5
	0.47	0.384286	0.75	0.445714	5.23857
	0.3	0.751429	0.291429	0.82	2.72429
	0.235714	0.335714	0.402857	0.3	4.65143
	0.697143	0.295714	0.175714	0.34	3.09857
	0.317143	0.252857	0.302857	0.271429	2.69429
	0.724286	0.281429	0.871429	0.7	4.31571
	1.44286	0.688571	1.5	0.878571	3.25857
	0.34	1.31429	2.81143	1.52714	11.79
		0.365714		0.572857

## Sheet: Fig. 5C
			Elder
	Control	Alum	MPLA	CpG	R848
	3.51714	0.805714	0.88	1.78857	7.42429
	3.38857	3.40714	2.45143	5.10286	7.16
	0.697143	3.71286	3.64857	3.69571	5.83857
	0.315714	0.768571	1.30286	3.09714	5.17
	0.51	0.314286	0.298571	0.522857	2.25429
	1.26286	0.422857	0.447143	0.404286	4.58
	0.318571	1.11429	1.22571	0.724286	3.25143
		0.395714	0.707143	1.23429	6.03429
				0.444286

## Sheet: Fig. 5D
			IFNɑ							IFN𝛄							TNF							IL-23p19							IL-17							IL-10
	Control	Alum	MPLA	CpG	R848			Control	Alum	MPLA	CpG	R848			Control	Alum	MPLA	CpG	R848			Control	Alum	MPLA	CpG	R848			Control	Alum	MPLA	CpG	R848			Control	Alum	MPLA	CpG	R848
	0.0371429	0.305714	0.0114286	0.385714	0.391429			1.14714	2.04714	1.06143	3.34143	7.71143			2.56857	0.144286	1.16286	0.285714	1.50857			4.59	0.13	1.04	0.198571	2.20571			0.0857143	1.02143	0.0657143	0.985714	1.01429			12.0043	2.16143	1.60143	3.58857	9.57857
	0.354286	0.405714	0.402857	0.485714	0.555714			2.07286	2.06143	2.46429	3.45571	6.10429			0.148571	0.182857	0.168571	0.394286	1.82			0.228571	0.134286	0.285714	0.268571	4.18714			1.25143	0.861429	1.23571	1.13286	1.11			2.93714	2.33714	3.57286	4.69571	14.7729
	0.391429	0.06	0.441429	0.0471429	0.5			2.07429	0.154286	2.22857	0.344286	1.57286			0.245714	0.0571429	0.201429	0.341429	0.385714			0.392857	0.0371429	0.258571	0.0442857	0.0728571			1.37143	0.0685714	1.33571	0.588571	0.208571			3.42714	0.275714	3.83571	0.54	1.56714
	0.105714	0.0257143	0.125714	0.0642857	0.02			0.23	0.228571	0.167143	0.324286	2.77143			0.0542857	0.0328571	0.0842857	0.292857	0.218571			0.0328571	0.0357143	0.0942857	0.06	0.111429			0.104286	0.487143	0.1	0.58	0.498571			0.237143	0.175714	0.322857	1.31857	0.711429
	0.02	0.03	0.0142857	0.12	0.03			0.21	0.212857	0.221429	0.288571	3.71286			0.0271429	0.0628571	0.0542857	0.208571	0.244286			0.0485714	0.06	0.0671429	0.132857	0.105714			0.555714	0.737143	0.561429	0.425714	0.528571			0.111429	0.164286	0.161429	1.81571	2.31286
	0.0242857	0.244286	0.0242857	0.122857	0.137143			0.267143	0.481429	0.23	0.468571	1.10143			0.0557143	0.0914286	0.0642857	0.354286	0.262857			0.0657143	0.0628571	0.09	0.0757143	0.301429			0.644286	0.747143	0.63	0.658571	0.45			0.134286	0.312857	0.255714	0.901429	3.84286
	0.164286	0.394286	0.162857	0.342857	0.2			0.245714	0.934286	0.261429	1.11143	3.62571			0.0785714	0.17	0.0942857	0.222857	0.642857			0.104286	0.0628571	0.177143	0.0942857	0.184286			0.652857	0.724286	0.728571	0.877143	0.47			1.71714	1.41429	1.72143	2.15143	2.46571
	0.207143	0.36	0.167143	0.504286	0.308571			0.505714	0.33	0.487143	0.662857	2.26143			0.13	0.245714	0.104286	0.557143	0.337143			0.0971429	0.02	0.0985714	0.02	0.112857			0.501429	0.0328571	0.524286	0.0314286	0.807143			0.41	0.11	0.37	0.281429	3.97571
	0.391429		0.385714		0.291429			1.16286		1.32571		5.28857			0.214286		0.195714		0.738571			0.0928571		0.108571		0.425714			0.947143		0.722857		0.0142857			1.90143		1.75571		3.56571
	0.268571		0.235714					0.277143		0.495714					0.158571		0.28					0.00857143		0.0657143					0.0342857		0.03					0.0871429		0.4
Mean	0.196429	0.228214	0.197143	0.259107	0.270476		Mean	0.819286	0.80625	0.894286	1.24964	3.79444		Mean	0.368143	0.123393	0.241	0.332143	0.684286		Mean	0.566143	0.0678571	0.228571	0.111786	0.856349		Mean	0.614857	0.585	0.593429	0.66	0.566825		Mean	2.29671	0.868929	1.39971	1.91161	4.75476
Fold change	1	1.16182	1.00364	1.31909	1.37697		Fold change	1	0.984089	1.09154	1.52528	4.63141		Fold change	1	0.335177	0.654637	0.902212	1.85875		Fold change	1	0.119859	0.403735	0.197451	1.5126		Fold change	1	0.951441	0.965149	1.07342	0.921881		Fold change	1	0.378336	0.609442	0.832323	2.07025

[truncated: 5 more sheets: Fig. 5E, Fig. 5F, Fig. 7C, Fig. 7D, Fig. S9 C]
